# Supplementary material for: Vitamin D Is Required for ILC3 Derived IL-22 and Protection From Citrobacter rodentium Infection
Source: PubMed Central journal article supplement (PMC6349822; doi:10.3389/fimmu.2019.00001), 2019-01-22
Supplement: Data_Sheet_1.pdf [file Data_Sheet_1.pdf]

**S**Table 1. Real time PCR primers used

| Gene                            |          | Primer Sequence                  |
|---------------------------------|----------|----------------------------------|
| <i>ifn-<math>\gamma</math></i>  | forward: | TGCATCTTGGCTTTGCAGCTCTTCCTCATGGC |
|                                 | reverse: | TGGACCTGTGGGTTGTTGACCTCAAACCTGGC |
| <i>il-17a</i>                   | forward: | CAGGGAGAGCTTCATCTGTGT            |
|                                 | reverse: | GCTGAGCTTTGAGGGATGAT             |
| <i>il-22</i>                    | forward: | TGACGACCAGAACATCCAGA             |
|                                 | reverse: | AATCGCCTTGATCTCTCCAC             |
| <i>vdr</i>                      | forward: | CCCCTTCAATGGAGATTGC              |
|                                 | reverse: | CTGCACCTCCTCATCTGTGA             |
| <i>rorc</i>                     | forward: | GACAGGGAGCCAAGTTCTCA             |
|                                 | reverse: | CTTGTCCCCACAGATCTTGCA            |
| <i>hpri</i>                     | forward: | CAGACTGAAGAGCTATTGTAATG          |
|                                 | reverse: | CCAGTGTCAATTATATCTTCCAC          |
| <i><math>\beta</math>-actin</i> | forward: | AGAGGGAAATCGTGCGTGAC             |
|                                 | reverse: | CAATAGTGATGACCTGGCCGT            |

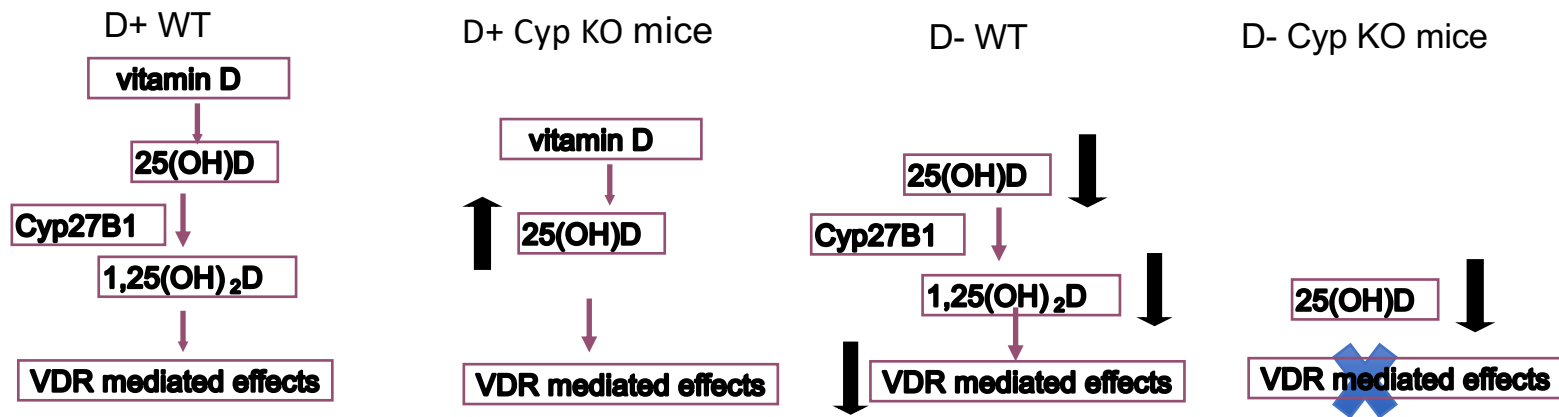

Supplemental figure 1: Cyp27B1 (Cyp) is the enzyme that produces high affinity 1,25(OH)<sub>2</sub>D from the precursor 25(OH)D. Feeding Cyp knockout (KO) mice diets that contain vitamin D (D+) results in the accumulation of 25(OH)D which is a low affinity ligand for the vitamin D receptor (VDR). Feeding mice diets without vitamin D (D-) greatly reduces but does not eliminate all of the 25(OH)D. D- WT mice produce low levels of 1,25(OH)<sub>2</sub>D from the residual 25(OH)D. D- Cyp KO mice have low levels of 25(OH)D and no 1,25(OH)<sub>2</sub>D. D- Cyp KO mice therefore have a complete absence of VDR mediated effects.

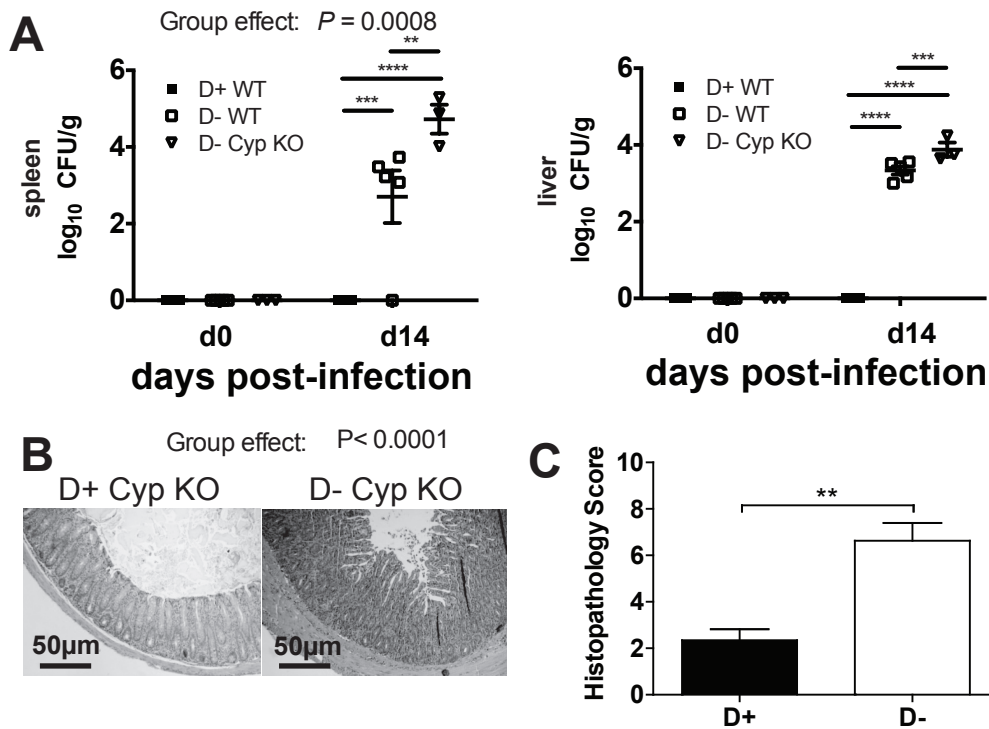

**Supplemental figure 2: Systemic *C. rodentium* infection and increased colonic pathology in D- mice.** **A)** *C. rodentium* CFU/g in the spleen and liver and **B)** colonic histopathology at d14 post-infection. 10x magnification. The D+ Cyp KO section histology score = 2 and the D- Cyp KO histology score shown = 6. **C)** Combined histological scores of the distal colon at d14 post-infection, n=4 mice/group. Significance was determined using two-way ANOVA with Bonferroni post-hoc tests (A) and two-tailed Student's t test (C) \*\*  $P < 0.01$ , \*\*\* $P < 0.001$ .

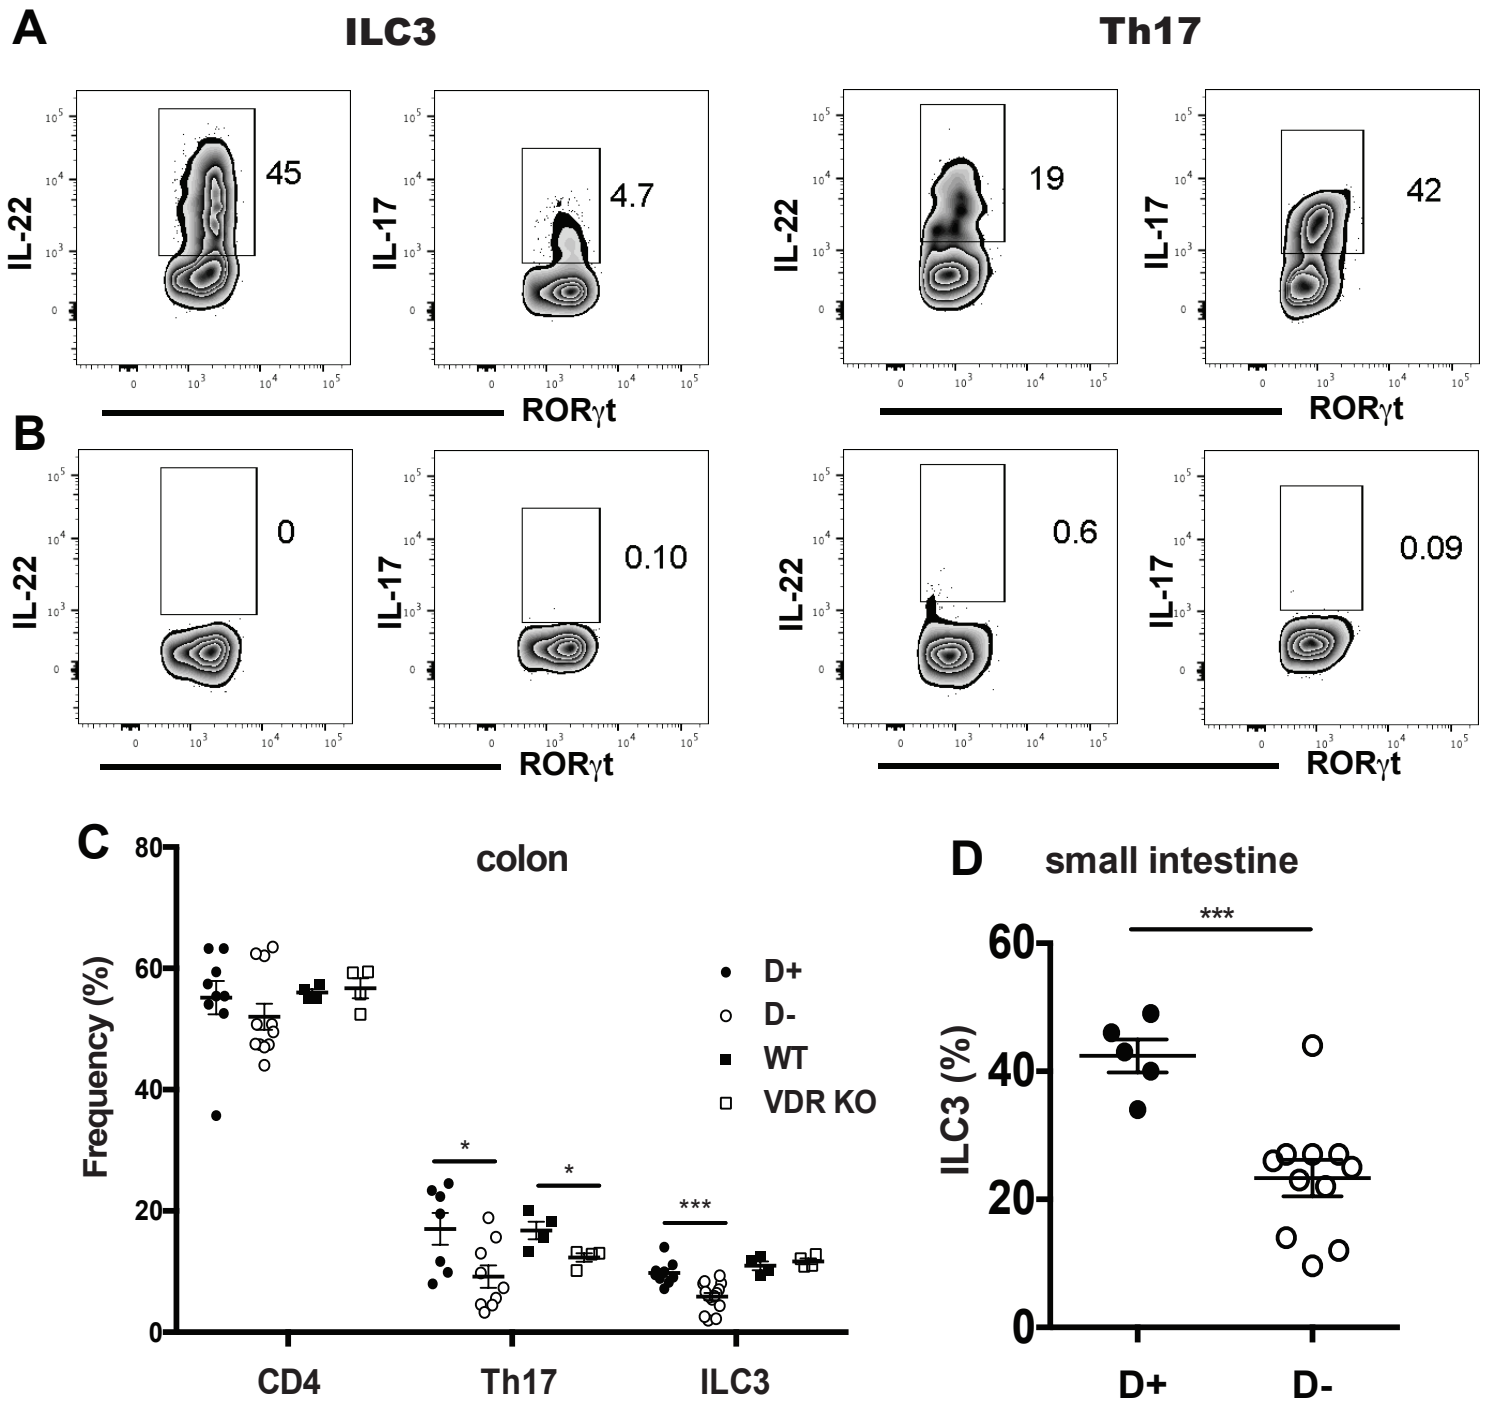

**Supplementary figure 3. Frequencies of Th17 and ILC3 in the colon and small intestine of D- and VDR KO mice. A) and B) Representative Intracellular cytokine staining plots of IL-22 and IL-17 in colonic ILC3s and Th17 cells. C) Frequencies of Th17, and ILC3 in the colon of D+, D-, WT and VDR KO mice. Data shown are representative or combined data of two independent experiments with n=4-9/group. D) Frequencies of ILC3 cells in small intestinal LPL of D+ and D- mice. Data shown are combined data of two independent experiments with n=5-11/group. Significance was determined using two-tailed Student's t test \* P<0.05,**

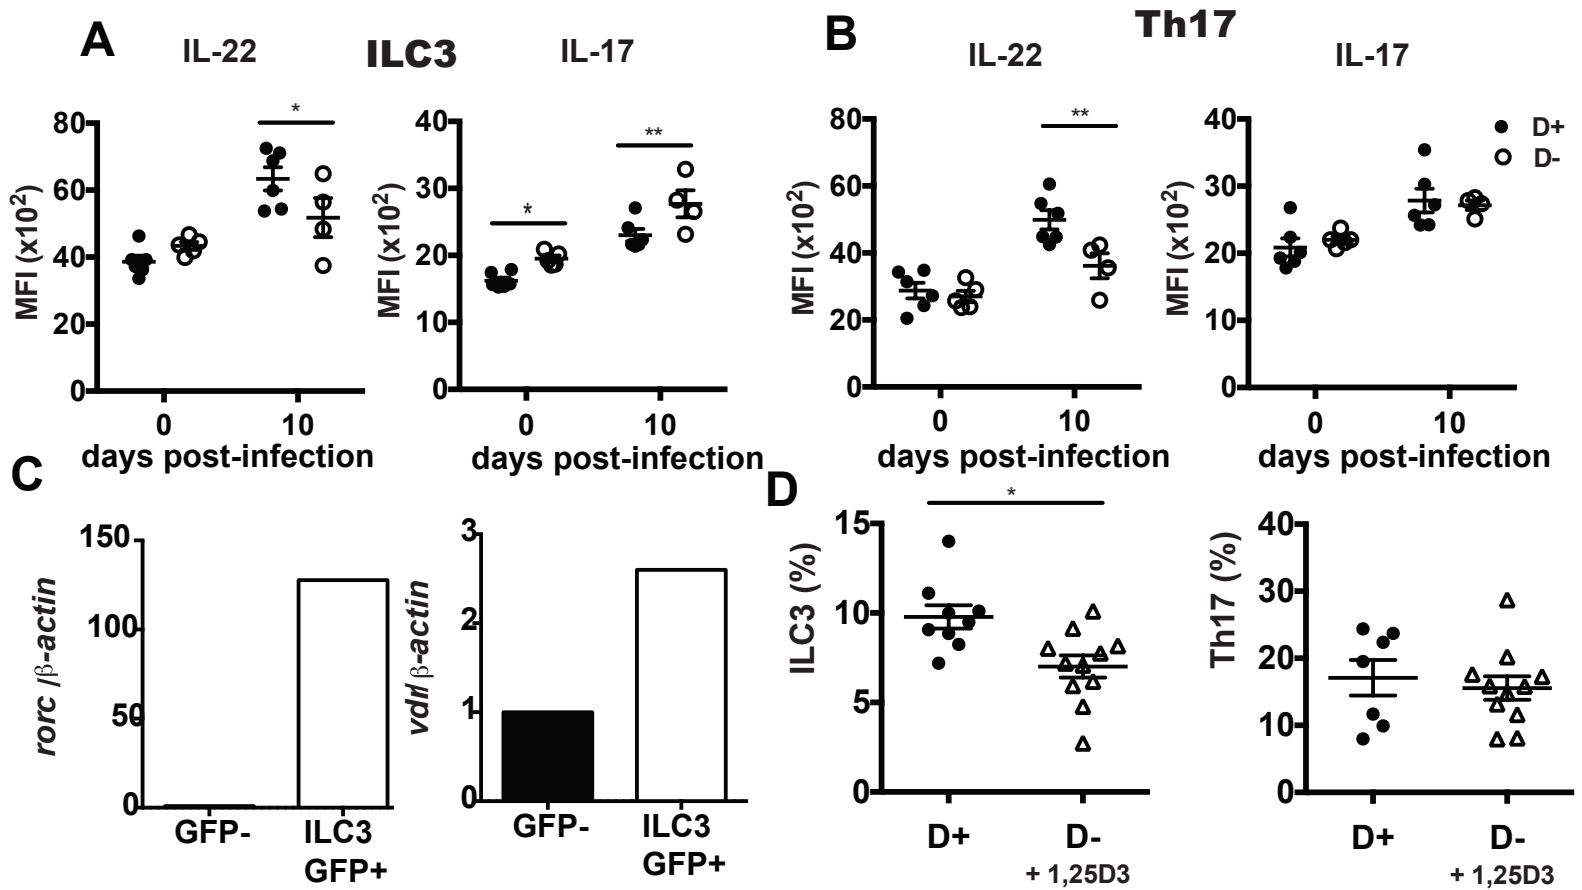

**Supplementary figure 4. MFI and effect of 1,25D on immune cells in the colon.** Mean fluorescent intensity (MFI) of IL-22 and IL-17 staining in **A**) ILC3 or **B**) Th17 cells in the colon of D+ and D- mice. Values are mean  $\pm$  SEM of two combined experiments and  $n = 4-6$  mice/group. Significance was determined using two-way ANOVA with Bonferroni post-hoc tests. D- mice were treated with 1,25D beginning at 6 wks of age. Frequencies of **C**) ROR $\gamma$ <sup>+</sup> ILC3 cells express higher *vdr* mRNA in the colon than other ILCs. Relative mRNA expression for *rorc* and *vdr* in FACS-purified ROR $\gamma$ <sup>+</sup>(GFP+) and GFP- ILCs isolated in the intestine of Rag1 KO mice. **D**) ILC3 and Th17 in the colon. Values are mean  $\pm$  SEM from 2 independent experiments and  $n = 8-11$  mice/group. Two-tailed Student's *t*, \*  $P < 0.05$ .
